# Supplementary material
Source: PubMed Central journal article supplement (PMC4783217)
Supplement: NIHMS714543-supplement-Supp_TableS1-S6.pdf [file NIHMS714543-supplement-Supp_TableS1-S6.pdf]

**Table S1.** *SLC44A2* amplification primers

| Amplicon | Specificity | Name         | Location* | Position†       | Nucleotide Sequence (5'- 3') | Orientation | PCR conditions                                                                                                   |                                                                           | Amplicon Size |
|----------|-------------|--------------|-----------|-----------------|------------------------------|-------------|------------------------------------------------------------------------------------------------------------------|---------------------------------------------------------------------------|---------------|
|          |             |              |           |                 |                              |             | Thermocycling conditions‡                                                                                        | MgCl <sub>2</sub> & primer concentration                                  |               |
| 1        | Exon 1      | QEX1AMF      | 5'UTR     | -242..-221      | AGCCTCAATATCTCCTTGACGA       | sense       | Denaturation: 95°C for 30 sec<br>Annealing: 58°C for 30 sec<br>Extension: 72°C for 3 min<br>Number of cycles: 35 | MgCl <sub>2</sub> : 1.5 mM<br>Forward and reverse primers:<br>0.1 µM each | 825 bp        |
|          |             | QEX1AMR      | Intron 1  | 564.. 545       | TTCGGTCTGCCAGTCTTGC          | antisense   |                                                                                                                  |                                                                           |               |
| 2        | Exon 2      | QEX2AMF1     | Intron 1  | 23,417..23,436  | CTTACTCTCCCCTACCCGAA         | sense       | Denaturation: 95°C for 30 sec<br>Annealing: 57°C for 30 sec<br>Extension: 72°C for 3 min<br>Number of cycles: 35 | MgCl <sub>2</sub> : 1.5 mM<br>Forward and reverse primers:<br>0.1 µM each | 1001 bp       |
|          |             | QEX2AMR1     | Intron 2  | 24,398.. 24,379 | CAGAAGACGTGCTTGAACCA         | antisense   |                                                                                                                  |                                                                           |               |
| 3        | Exon 3-4    | CL2-A3bF     | Intron 2  | 24,440..24,457  | GACTACTCAGAGGCTACT           | sense       | Denaturation: 95°C for 30 sec<br>Annealing: 58°C for 30 sec<br>Extension: 72°C for 3 min<br>Number of cycles: 35 | MgCl <sub>2</sub> : 2 mM<br>Forward and reverse primers:<br>0.15 µM each  | 2017 bp       |
|          |             | CL2-A3bR     | Intron 4  | 26,456.. 26,439 | GGCACATCTAACCATCAA           | antisense   |                                                                                                                  |                                                                           |               |
| 4        | Exon 5-10   | QEX5-10AMF   | Intron 4  | 28,513..28,533  | ATCACACCATTGCACTCCATC        | sense       | Denaturation: 95°C for 30 sec<br>Annealing: 59°C for 30 sec<br>Extension: 72°C for 3 min<br>Number of cycles: 35 | MgCl <sub>2</sub> : 1.5 mM<br>Forward and reverse primers:<br>0.1 µM each | 1630 bp       |
|          |             | QEX5-10AMR   | Intron 10 | 30,122.. 30,102 | TGCATCCTTAACCTACGGTGCT       | antisense   |                                                                                                                  |                                                                           |               |
| 5        | Exon 11-14  | QEX11-14AMF  | Intron 10 | 31,930..31,948  | GAATCGCTTGAACCCGTGA          | sense       | Denaturation: 95°C for 30 sec<br>Annealing: 60°C for 30 sec<br>Extension: 72°C for 3 min<br>Number of cycles: 35 | MgCl <sub>2</sub> : 1.5 mM<br>Forward and reverse primers:<br>0.1 µM each | 1267 bp       |
|          |             | QEX11-14AMR  | Intron 14 | 33,176.. 33,156 | CACCTAGCACAGGACATGCAA        | antisense   |                                                                                                                  |                                                                           |               |
| 6        | Exon 15-16  | QEX15-16AMF  | Intron 14 | 33,650..33,669  | TTTCTGTCTCCATGCCCTC          | sense       | Denaturation: 95°C for 30 sec<br>Annealing: 60°C for 30 sec<br>Extension: 72°C for 3 min<br>Number of cycles: 35 | MgCl <sub>2</sub> : 1.5 mM<br>Forward and reverse primers:<br>0.1 µM each | 825 bp        |
|          |             | QEX15-16AMR1 | Intron 16 | 34,455.. 34,436 | GACTCAATCACGCCAACTCC         | antisense   |                                                                                                                  |                                                                           |               |
| 7        | Exon 17-20  | CL2-A6bF     | Intron 16 | 34,961..34,980  | GGGATTGATGGTACTTTGTT         | sense       | Denaturation: 95°C for 30 sec<br>Annealing: 58°C for 30 sec<br>Extension: 72°C for 3 min<br>Number of cycles: 35 | MgCl <sub>2</sub> : 2 mM<br>Forward and reverse primers:<br>0.15 µM each  | 1012 bp       |
|          |             | CL2-A6bR     | Intron 20 | 35,972..35,955  | CCACCTCTGACCTCTATC           | antisense   |                                                                                                                  |                                                                           |               |
| 8        | Exon 21-22  | CL2-A7bF     | Intron 20 | 39,803..39,820  | TAATCCAAAGAGGGTTTC           | sense       | Denaturation: 95°C for 30 sec<br>Annealing: 54°C for 30 sec<br>Extension: 72°C for 3 min<br>Number of cycles: 35 | MgCl <sub>2</sub> : 2 mM<br>Forward and reverse primers:<br>0.15 µM each  | 2401 bp       |
|          |             | CL2-A7bR     | 3'UTR     | 42,203.. 42,186 | CTAGTTCAGAGACTCCTA           | antisense   |                                                                                                                  |                                                                           |               |

\* 5'UTR: 5' untranslated region; 3'UTR: 3' untranslated region

† relative to NCBI Reference Sequence NC\_000019.9

‡ Initial denaturation was at 95°C for 2 min and final extension at 72 °C for 7 min. The final reaction volume was 25 ul containing 100 ng of genomic DNA; 0.2 mM of each dNTP and 0.125 µl Taq polymerase (FastStart High Fidelity PCR System; Roche Applied Science, Indianapolis, IN)

**Table S2.** *SLC44A2* sequencing primers

| Name     | Location *       | Position †     | Sequence                 | Orientation | Region sequenced |
|----------|------------------|----------------|--------------------------|-------------|------------------|
| CL2-S1F1 | 5'UTR            | -175..-154     | ACCATGCACACCTCAAGAGGG    | sense       | 5'UTR, Exon 1    |
| CL2-S2F2 | Intron 1         | 23,636..23,655 | GGGGGCTTGGGTGTGGTCAC     | sense       | Exon 2           |
| QS3F2    | Intron 2         | 25,146..25166  | TGGTACGGCATTCAAACGACT    | sense       | Exon 3           |
| CL2-S2R1 | Intron 4         | 25,712..25,692 | TGCCTCGGCCTCCCAAAGTGT    | antisense   | Exon 4           |
| CL2-S3R1 | Intron 7         | 29,171..29,150 | CAGAGGATGGCACCAGTCAGGC   | antisense   | Exon 5,6,7       |
| CL2-S3F3 | Intron 7         | 29,101..29,121 | GGGATCCCAGGAGGCTCAGGT    | sense       | Exon 8, 9, 10    |
| CL2-S4F1 | Intron 10        | 32,222..32,242 | GGGCGGTGGGAAGTCAAG       | sense       | Exon 11, 12      |
| CL2-S4F2 | Exon12/Intron 12 | 32,619..32,637 | GAAGCCAGCAGGTGGGGGG      | sense       | Exon 13, 14      |
| CL2-S4F3 | Intron 14        | 33,781..33,804 | CTACCTCATGGTTTTCTGGCCCC  | sense       | Exon 15, 16      |
| CL2-S5F1 | Intron 16        | 35,082..35,103 | TGACAGCGTGGACTCAGGAGAC   | sense       | Exon 17, 18      |
| CL2-S5F2 | Exon 18          | 35,429..35,450 | CAATTTCTGCACCTCGGCCAGG   | sense       | Exon 19, 20      |
| CL2-S6F1 | Intron 20        | 39,811..39,832 | AGAGGGTTTCTCAGCAGGGGAAG  | sense       | Exon 21          |
| CL2-S6F2 | Intron 21        | 40,694..40,715 | AGTCTGCCCCTCTCTGGTCCCA   | sense       | Exon 22          |
| CL2-S6F3 | 3'UTR            | 41,051..41,070 | TGCCCCTCCCCATGAGCCAG     | sense       | 3'UTR            |
| CL2-S6F4 | 3'UTR            | 41,390..41,410 | GCTCAAGGGCCACCAGAAGCA    | sense       | 3'UTR            |
| CL2-S6F5 | 3'UTR            | 41,708..41,731 | CCCGACTTCCTCTGCCAGTTATTG | sense       | 3'UTR            |

\* UTR- untranslated region

† relative to NCBI Reference Sequence NC\_000019.9 (range 10713121..10755235)

**Table S3.** Genetic variations identified in the *SLC44A2* exons

| Exon       | Nucleotide Change * | dbSNP reference no. | Protein residue change † | Donor observations |              |      |            |                     |                           |              |      |            | NHLBI ESP VAF       |           |                  |
|------------|---------------------|---------------------|--------------------------|--------------------|--------------|------|------------|---------------------|---------------------------|--------------|------|------------|---------------------|-----------|------------------|
|            |                     |                     |                          | Caucasians (N=96)  |              | VAF  | 95% CI     | HWE <i>p</i> value‡ | African Americans (N=200) |              | VAF  | 95% CI     | HWE <i>p</i> value‡ | Caucasian | African American |
|            |                     |                     |                          | Homozygous         | Heterozygous |      |            |                     | Homozygous                | Heterozygous |      |            |                     |           |                  |
| 1 (5'UTR)  | c.-77T>A ‡          | Novel               | NA                       | 0                  | 0            | 0%   | 0-1.7%     | 0                   | 0                         | 5            | 1%   | 0.5-2.8%   | 0.86                | NA        | NA               |
| 1          | c.6G>A ‡            | rs115559926         | Glu2Glu ‡                | 0                  | 0            | 0%   | 0-1.7%     | 0                   | 0                         | 15           | 4%   | 2.0-5.9%   | 0.58                | NA        | 3.4% ¶           |
| 4          | c.204T>C            | rs3087969           | Asp68Asp                 | 6                  | 26           | 20%  | 13.7-26.7% | 0.15                | 2                         | 48           | 13%  | 9.5-16.7%  | 0.39                | 21.4%     | 15.8%            |
| 7          | c.457C>T            | rs147820753         | Leu153Phe                | 0                  | 2            | 1%   | 0.2-2.9%   | 0.92                | 0                         | 2            | 0.5% | 0.09-1.4%  | 0.94                | 0.6%      | 0.1%             |
| 7          | c.461G>A            | rs2288904           | Arg154Gln                | 6                  | 25           | 19%  | 13.7-26.3% | 0.11                | 0                         | 15           | 4%   | 2.0-5.9%   | 0.58                | 21.3%     | 6.6%             |
| 10         | c.732G>A            | rs146127348         | Ala244Ala                | 0                  | 0            | 0%   | 0-1.7%     | 0                   | 0                         | 2            | 0.5% | 0.09-1.4%  | 0.94                | 0%        | 0.5%             |
| 10         | c.822C>T            | rs141667578         | Tyr274Tyr                | 0                  | 0            | 0%   | 0-1.7%     | 0                   | 0                         | 1            | 0.3% | 0.01-1.3%  | 0.97                | 0.01%     | 0.02%            |
| 12         | c.1035A>G           | rs35362308          | Ala345Ala                | 0                  | 0            | 0%   | 0-1.7%     | 0                   | 1                         | 26           | 7%   | 4.8-9.9%   | 0.98                | 0.02%     | 4%               |
| 13         | c.1140C>T           | rs7255431           | Ser380Ser                | 0                  | 0            | 0%   | 0-1.7%     | 0                   | 1                         | 28           | 8%   | 5.1-10.4%  | 0.89                | 0.02%     | 4%               |
| 22         | c.2043G>A           | rs34625417          | Ser681Ser                | 0                  | 1            | 0.5% | 0.03-2.8%  | 0.96                | 2                         | 30           | 8%   | 5.9-11.8%  | 0.61                | 0.06%     | 7.5%             |
| 22         | c.2046C>G           | rs151043533         | Ala682Ala                | 0                  | 0            | 0%   | 0-1.7%     | 0                   | 0                         | 1            | 0.3% | 0.01-1.3%  | 0.97                | 0%        | 0.5%             |
| 22 (3'UTR) | c.2363T>C           | rs116639546         | NA                       | 0                  | 0            | 0%   | 0-1.7%     | 0                   | 0                         | 8            | 2%   | 0.8-3.7%   | 0.77                | NA        | 3.4% ¶           |
| 22 (3'UTR) | 2460G>A             | rs1053007           | NA                       | 14                 | 46           | 38%  | 30.6-47.8% | 0.91                | 14                        | 93           | 30%  | 24.8-36%   | 0.15                | 38.9% ¶   | 30% ¶            |
| 22 (3'UTR) | c.2874G>A           | rs74795234          | NA                       | 1                  | 5            | 4%   | 1.7-7.2%   | 0.01                | 0                         | 11           | 3%   | 1.3-4.8%   | 0.69                | 2.2% €    |                  |
| 22 (3'UTR) | c.2965T>G           | rs10948             | NA                       | 11                 | 41           | 33%  | 24.8-41.6% | 0.76                | 3                         | 56           | 16%  | 11.9-19.7% | 0.33                | 36.7% ¶   | 11.5% ¶          |

\* relative to NCBI Reference Sequence NM\_020428.3

† relative to NCBI Reference Sequence NP\_065161.3

‡ relative to NCBI Reference Sequence NM\_001145056.1 and NP\_001138528.1

¶ dbSNP VAF

€ global VAF from 1000Genome phase 1 genotype data from 1094 worldwide individuals

¥ HWE *p*-value with 1 degree of freedomNHLBI ESP – NHLBI Exome Sequencing Project (<http://evs.gs.washington.edu/EVS>). Total number of samples in Caucasians = 4300; and total number of samples in African Americans = 2203

MAF-minor allele frequency

NA- Not available

**Table S4.** Genetic variations detected in the *SLC44A2* introns

| Location  | Nucleotide Change * | dbSNP reference no. | Donors observed (n) |                  |                          | VAF observed |            |                    |                  |           |                    | NHLBI ESP VAF |                  |
|-----------|---------------------|---------------------|---------------------|------------------|--------------------------|--------------|------------|--------------------|------------------|-----------|--------------------|---------------|------------------|
|           |                     |                     | Zygoty              | Caucasian (N=96) | African American (N=200) | Caucasian    |            |                    | African American |           |                    | Caucasian     | African American |
|           |                     |                     |                     |                  |                          | VAF          | 95% CI     | HWE <i>p</i> value | VAF              | 95% CI    | HWE <i>p</i> value |               |                  |
| Intron 1  | c.31+12C>T †        | rs189105123         | Homozygous          | 0                | 0                        | 1.5%         | 0.4-4.2%   | 0.87               | 0.2%             | 0.01-1.3% | 0.97               | NA            | NA               |
|           |                     |                     | Heterozygous        | 3                | 1                        |              |            |                    |                  |           |                    |               |                  |
|           | c.31+85G>A †        | rs74436647          | Homozygous          | 1                | 0                        | 6%           | 3.5-10.6%  | 0.28               | 2.5%             | 1.3-4.4%  | 0.72               | NA            | NA               |
|           |                     |                     | Heterozygous        | 10               | 10                       |              |            |                    |                  |           |                    |               |                  |
|           | c.31+185C>T †       | rs113379022         | Homozygous          | 6                | 0                        | 30%          | 22.6-37.8% | 0.23               | 4%               | 2.4-6.4%  | 0.56               | NA            | NA               |
|           |                     |                     | Heterozygous        | 45               | 16                       |              |            |                    |                  |           |                    |               |                  |
|           | c.32-62C>T †        | rs114095820         | Homozygous          | 0                | 0                        | 0.5%         | 0.03-2.8%  | 0.96               | 2%               | 0.8-3.7%  | 0.77               | 0.03%         | 2.5%             |
|           |                     |                     | Heterozygous        | 1                | 8                        |              |            |                    |                  |           |                    |               |                  |
| Intron 5  | c.331-44G>A         | rs12972963          | Homozygous          | 7                | 2                        | 20%          | 14.4-27.2% | 0.06               | 12%              | 8.7-15.5% | 0.60               | 21.4%         | 15.9%            |
|           |                     |                     | Heterozygous        | 25               | 43                       |              |            |                    |                  |           |                    |               |                  |
| Intron 7  | c.503-15C>T         | rs1560711           | Homozygous          | 6                | 2                        | 20%          | 13.7-26.7% | 0.15               | 13%              | 9.9-17.0% | 0.35               | 21.4%         | 15.3%            |
|           |                     |                     | Heterozygous        | 26               | 49                       |              |            |                    |                  |           |                    |               |                  |
| Intron 8  | c.626+18T>C         | rs1560710           | Homozygous          | 6                | 1                        | 20%          | 13.7-26.7% | 0.15               | 13%              | 9.5-16.7% | 0.14               | 21.4%         | 15.3%            |
|           |                     |                     | Heterozygous        | 26               | 50                       |              |            |                    |                  |           |                    |               |                  |
|           | c.626+38T>G         | rs1560709           | Homozygous          | 6                | 1                        | 20%          | 13.7-26.7% | 0.15               | 13%              | 9.5-16.7% | 0.14               | 21.4%         | 15.3%            |
|           |                     |                     | Heterozygous        | 26               | 50                       |              |            |                    |                  |           |                    |               |                  |
| Intron 9  | c.711-41C>T         | rs114989609         | Homozygous          | 0                | 0                        | 0%           | 0-1.7%     | 0                  | 1%               | 0.3-2.4%  | 0.89               | 0%            | 1.8%             |
|           |                     |                     | Heterozygous        | 0                | 4                        |              |            |                    |                  |           |                    |               |                  |
| Intron 10 | c.823+164C>T        | rs9797854           | Homozygous          | 6                | 1                        | 19%          | 13.7-26.3% | 0.11               | 10%              | 6.6-12.8% | 0.51               | NA            | NA               |
|           |                     |                     | Heterozygous        | 25               | 36                       |              |            |                    |                  |           |                    |               |                  |
|           | c.823+294C>T        | rs9797861           | Homozygous          | 6                | 1                        | 19%          | 13.7-26.3% | 0.11               | 13%              | 9.9-17.0% | 0.79               | NA            | NA               |
|           |                     |                     | Heterozygous        | 25               | 51                       |              |            |                    |                  |           |                    |               |                  |
|           | c.823+304T>C        | rs138838423         | Homozygous          | 0                | 1                        | 0%           | 0-1.7%     | 0                  | 6%               | 4.2-9.0%  | 0.79               | NA            | NA               |
|           |                     |                     | Heterozygous        | 0                | 23                       |              |            |                    |                  |           |                    |               |                  |
| Intron 12 | c.1055+15C>T        | rs2163832           | Homozygous          | 12               | 0                        | 33%          | 25.9-41.8% | 0.54               | 6%               | 4.2-9.0%  | 0.35               | 32.5%         | 10%              |
|           |                     |                     | Heterozygous        | 40               | 25                       |              |            |                    |                  |           |                    |               |                  |
| Intron 13 | c.1148+11C>A        | rs7255439           | Homozygous          | 0                | 1                        | 0%           | 0-1.7%     | 0                  | 8%               | 5.1-10.4% | 0.89               | 0.02%         | 4%               |
|           |                     |                     | Heterozygous        | 0                | 28                       |              |            |                    |                  |           |                    |               |                  |
|           | c.1148+41C>A        | rs115004332         | Homozygous          | 0                | 0                        | 0.5%         | 0.03-2.8%  | 0.96               | 8%               | 5.7-11.3% | 0.20               | 0.03%         | 9%               |
|           |                     |                     | Heterozygous        | 1                | 33                       |              |            |                    |                  |           |                    |               |                  |

|           |               |             |              |    |    |      |            |      |     |            |      |       |      |
|-----------|---------------|-------------|--------------|----|----|------|------------|------|-----|------------|------|-------|------|
| Intron 14 | c.1233+14G>A  | rs115585815 | Homozygous   | 0  | 0  | 0.5% | 0.03-2.8%  | 0.96 | 8%  | 5.7-11.3%  | 0.20 | 0.03% | 8.6% |
|           |               |             | Heterozygous | 1  | 33 |      |            |      |     |            |      |       |      |
| Intron 16 | c.1592-25C>T  | rs79521494  | Homozygous   | 0  | 0  | 3%   | 2.8-9.9%   | 0.55 | 2%  | 1.1-4.2%   | 0.74 | 3.4%  | 2.6% |
|           |               |             | Heterozygous | 11 | 9  |      |            |      |     |            |      |       |      |
| Intron 18 | c.1769+34C>T  | rs139577429 | Homozygous   | 0  | 0  | 0%   | 0-1.7%     | 0    | 1%  | 0.5-2.8%   | 0.86 | 0%    | 0.3% |
|           |               |             | Heterozygous | 0  | 5  |      |            |      |     |            |      |       |      |
| Intron 19 | c.1840+51C>T  | rs3859514   | Homozygous   | 15 | 7  | 38%  | 29.7-47.0% | 0.83 | 22% | 17.8-27.4% | 0.21 | 35.4% | 28%  |
|           |               |             | Heterozygous | 43 | 76 |      |            |      |     |            |      |       |      |
|           | c.1841-53C>G  | rs76374006  | Homozygous   | 0  | 0  | 5%   | 2.8-9.2%   | 0.59 | 2%  | 0.8-3.4%   | 0.80 | 6.8%  | 1.2% |
|           |               |             | Heterozygous | 10 | 7  |      |            |      |     |            |      |       |      |
| Intron 21 | c.2014+144C>T | rs149845008 | Homozygous   | 0  | 0  | 0%   | 0-1.7%     | 0    | 2%  | 0.6-3.2%   | 0.83 | NA    | NA   |
|           |               |             | Heterozygous | 0  | 6  |      |            |      |     |            |      |       |      |
|           | c.2014+322T>C | rs79965874  | Homozygous   | 0  | 0  | 0%   | 0-1.7%     | 0    | 2%  | 0.6-3.2%   | 0.83 | NA    | NA   |
|           |               |             | Heterozygous | 0  | 6  |      |            |      |     |            |      |       |      |
|           | c.2014+369G>A | rs114916976 | Homozygous   | 0  | 0  | 0.5% | 0.03-2.8%  | 0.96 | 2%  | 0.8-3.4%   | 0.80 | NA    | NA   |
|           |               |             | Heterozygous | 1  | 7  |      |            |      |     |            |      |       |      |

\* relative to NCBI Reference Sequence NM\_020428.3

† relative to NCBI Reference Sequence NM\_001145056.1

¶ dbSNP MAF

€ global MAF from 1000Genome phase 1 genotype data from 1094 worldwide individuals

NHLBI ESP – NHLBI Exome Sequencing Project (<http://evs.gs.washington.edu/EVS>). Total number of samples in Caucasians = 4300; and total number of samples in African Americans = 2203

MAF minor allele frequency

NA- Not available

**Table S5. SLC44A2 potential alleles and their frequencies in African Americans and Caucasians**

| Allele number        | Haplotype*                                       | Haplotype frequency |       |           |              |       |           |
|----------------------|--------------------------------------------------|---------------------|-------|-----------|--------------|-------|-----------|
|                      |                                                  | African American    |       |           | Caucasian    |       |           |
|                      |                                                  | Observed (n)        | Mean† | 95% CI‡   | Observed (n) | Mean† | 95% CI‡   |
| KM024996             | TGCGCCTGCG <b>T</b> TTTCGCTTTACCCCGCCCCCTGGCTGGT | 219                 | 54.8% | 47.4-62.3 | 76           | 39.6% | 30.6-49.1 |
| 1                    | -----CA- <b>A</b> CCG-A-CC--T-----T-----A-G      | 2                   | 0.5%  | 0.09-1.7  | 0            | 0%    | 0-1.7     |
| 2                    | -----CA- <b>A</b> CCG-----CC-----                | 0                   | 0%    | 0-0.8     | 1            | 0.5%  | 0.03-2.8  |
| 3                    | -----CA--CCG---CC-----AA-----                    | 1                   | 0.25% | 0.01-1.3  | 0            | 0%    | 0-1.7     |
| 4                    | -----CA--CCG---C-----AA--T-----A--               | 1                   | 0.25% | 0.01-1.3  | 0            | 0%    | 0-1.7     |
| 5                    | -----CA--CCG---C-----AA--T-T-----A--             | 1                   | 0.25% | 0.01-1.3  | 0            | 0%    | 0-1.7     |
| 6                    | -----CA--CCG-----AA--T-----A-G                   | 1                   | 0.25% | 0.01-1.3  | 0            | 0%    | 0-1.7     |
| 7                    | -----CA--CCG---C-----AA--T-----CA-G              | 2                   | 0.5%  | 0.09-1.7  | 0            | 0%    | 0-1.7     |
| 8                    | -----CA--CCG---CC-----AA--T-----CA-G             | 2                   | 0.5%  | 0.09-1.7  | 0            | 0%    | 0-1.7     |
| 9                    | -----CA--CCG---C-----AA--T-----G-A-G             | 1                   | 0.25% | 0.01-1.3  | 0            | 0%    | 0-1.7     |
| 10                   | ---A---A--CCG---CC-----AA--T-----A-G             | 1                   | 0.25% | 0.01-1.3  | 0            | 0%    | 0-1.7     |
| 11                   | -----A--CCG---C-----AA--T-----A-G                | 1                   | 0.25% | 0.01-1.3  | 0            | 0%    | 0-1.7     |
| 12                   | -----C---CCG---CC-----T-----A-G                  | 2                   | 0.5%  | 0.09-1.7  | 0            | 0%    | 0-1.7     |
| 13                   | A-----CC--T-----T-----A-G                        | 1                   | 0.25% | 0.01-1.3  | 0            | 0%    | 0-1.7     |
| 14                   | -----AA--T-----A-G                               | 1                   | 0.25% | 0.01-1.3  | 0            | 0%    | 0-1.7     |
| 15                   | -----AA--T-----A--                               | 1                   | 0.25% | 0.01-1.3  | 0            | 0%    | 0-1.7     |
| 16                   | ----T-----T-----A-G                              | 0                   | 0%    | 0-0.8     | 2            | 1.0%  | 0.18-2.9  |
| 17                   | -----A-G                                         | 1                   | 0.25% | 0.01-1.3  | 0            | 0%    | 0-1.7     |
| 18                   | -----T---C--TA-----A-A--                         | 1                   | 0.25% | 0.01-1.3  | 0            | 0%    | 0-1.7     |
| 19                   | -----T---G-TA-----A--A--                         | 2                   | 0.5%  | 0.09-1.7  | 0            | 0%    | 0-1.7     |
| 20                   | -----G-TA-----                                   | 1                   | 0.25% | 0.01-1.3  | 0            | 0%    | 0-1.7     |
| 21                   | -----TA-----A--                                  | 1                   | 0.25% | 0.01-1.3  | 0            | 0%    | 0-1.7     |
| 22                   | ---A-----T-T-----A--                             | 1                   | 0.25% | 0.01-1.3  | 0            | 0%    | 0-1.7     |
| 23                   | ----T-----T-T-----                               | 0                   | 0%    | 0-0.8     | 1            | 0.5%  | 0.03-2.8  |
| 24                   | -----CA-----T-T-----                             | 0                   | 0%    | 0-0.8     | 1            | 0.5%  | 0.03-2.8  |
| 25                   | -----T-T-----                                    | 1                   | 0.25% | 0.01-1.3  | 0            | 0%    | 0-1.7     |
| 26                   | ---A--CA-----T-T-----A--                         | 1                   | 0.25% | 0.01-1.3  | 0            | 0%    | 0-1.7     |
| 27                   | A-----C-----G-----                               | 1                   | 0.25% | 0.01-1.3  | 0            | 0%    | 0-1.7     |
| 28                   | -A-----T-----                                    | 1                   | 0.25% | 0.01-1.3  | 0            | 0%    | 0-1.7     |
| 29                   | -A-----A-                                        | 1                   | 0.25% | 0.01-1.3  | 0            | 0%    | 0-1.7     |
| 30                   | ---T-----C-----                                  | 1                   | 0.25% | 0.01-1.3  | 0            | 0%    | 0-1.7     |
| 31                   | ---T-----T-----                                  | 1                   | 0.25% | 0.01-1.3  | 0            | 0%    | 0-1.7     |
| 32                   | -----A--A--                                      | 0                   | 0%    | 0-0.8     | 1            | 0.5%  | 0.03-2.8  |
| 33                   | -----C-----                                      | 1                   | 0.25% | 0.01-1.3  | 0            | 0%    | 0-1.7     |
| 34                   | -----C-----                                      | 1                   | 0.25% | 0.01-1.3  | 0            | 0%    | 0-1.7     |
| 35                   | -----T-----                                      | 1                   | 0.25% | 0.01-1.3  | 0            | 0%    | 0-1.7     |
| 36                   | -----T-----                                      | 1                   | 0.25% | 0.01-1.3  | 0            | 0%    | 0-1.7     |
| Confirmed haplotypes | See Table 1                                      | 145                 |       |           | 110          |       |           |
| Total                |                                                  | 400                 |       |           | 192          |       |           |

\* The nucleotides at the 61 SNP positions with variations are shown in 5' to 3' orientation (Table S3 and S4). The remaining 8131 nucleotide positions that we determined had no variation relative to the reference sequence KM024996. The SNP G/A (bold) determines the HNA-3a/b antigen polymorphism.

† Number of observed alleles (n)/Total number of alleles (African American=400 and Caucasian=192).

‡ 95% confidence interval (CI), Poisson distribution, two sided.<sup>32</sup>
